# Supplementary material for: Findings from a pilot randomised trial of a social network self-management intervention in COPD
Source: PubMed Central journal article supplement (PMC7278059; doi:10.1186/s12890-020-1130-1), 2020-06-08
Supplement: 12890_2020_1130_MOESM1_ESM.pdf [file 12890_2020_1130_MOESM1_ESM.pdf]

# Appendix 1

## Picture 1

**EU-GENIE Questionnaire**

**My Network**  
Please tell us about your network of friends, family and others you're in contact with, to help us supply you with the most useful results. For an example click here.

| Name                                                 | Every day                                      | Family member                                        | Spouse/partner       |
|------------------------------------------------------|------------------------------------------------|------------------------------------------------------|----------------------|
| <i>Their name, or just a nickname if you prefer.</i> | <i>How often are you in contact with them?</i> | <i>What type of relationship do they have to you</i> | <i>Who are they?</i> |

Once you have finished entering your information, drag your newly created pin to the diagram.

**My Top Results** | Weight management | Fitness and exercise classes | Swimming | Walking and outdoor activities | Social clubs

Financial and benefits advice | Volunteering opportunities | Diabetes | COPD

Print Your results

**My Top Results** | **My Favourites** (+)

**Health**

**Yoga - Gentle and Therapeutic - Beginner/Intermediate - Weight management**

**When?**  
Thurs: 10:00-11:30

**Where?**  
Unitarian Church, High Street, Newport, PO30 1SS  
[Street view](#)

**Contact**  
Tel: 01983 868 339  
Web:

**Info**  
Gentle and Therapeutic - Beginner/Intermediate  
Call Vicky on 01983 868339 or 07766615401

**Video**  
Back to all Results

Show Results Within: 1 Mile | 2 Miles | 5 Miles | 10 Miles
